# Supplementary material for: Changes in Serum N-Glycome for Risk Drinkers: A Comparison with Standard Markers for Alcohol Abuse in Men and Women
Source: MDPI journal article supplement (doi:10.3390/biom12020241), 2022-02-01

**Table S1.** The N-glycan composition of 46 peaks in control serum samples.

| Peak | Name      | Structure (major) | GU   | Peak | Name           | Structure (major) | GU   |
|------|-----------|-------------------|------|------|----------------|-------------------|------|
| GP1  | A1        |                   | 4.87 | GP16 | A2[3]BG1S[3]1  |                   | 7.90 |
| GP2  | FA1       |                   | 5.16 | GP17 | FA2[3]G1S[6]1  |                   | 7.99 |
| GP3  | A1[6]G1   |                   | 5.41 | GP18 | FA2[3]BG1S[3]1 |                   | 8.1  |
| GP4  | A2B       |                   | 5.53 | GP19 | A2G2S[6]1      |                   | 8.33 |
| GP5  | FA2       |                   | 5.87 | GP20 | A2BG2S[6]1     |                   | 8.45 |
| GP6  | M5        |                   | 6.25 | GP21 | A2G2S[3]1      |                   | 8.61 |
| GP7  | A2[6]BG1  |                   | 6.57 | GP22 | FA2G2S[6]1     |                   | 8.74 |
| GP8  | FA2[6]G1  |                   | 6.7  | GP23 | FA2BG2S[3]1    |                   | 9.00 |
| GP9  | FA2[3]G1  |                   | 6.82 | GP24 | A2G2S[3,6]2    |                   | 9.14 |
| GP10 | FA2[6]BG1 |                   | 6.97 | GP25 | A2G2S[3,6]2    |                   | 9.57 |

|      |               |  |       |      |                 |  |       |
|------|---------------|--|-------|------|-----------------|--|-------|
| GP11 | M6 D3         |  | 7.11  | GP26 | A2BG2S[3,6]2    |  | 9.74  |
| GP12 | A1[3]G1S[3]1  |  | 7.19  | GP27 | FA2G2S[3,6]2    |  | 9.99  |
|      | A2G2          |  |       | GP28 | FA2BG2S[6,6]2   |  | 10.15 |
| GP13 | A2BG2         |  | 7.24  | GP29 | A3G3S[3,6]2     |  | 10.28 |
| GP14 | FA2G2         |  | 7.60  | GP30 | A4G4S[3]1       |  | 10.56 |
| GP15 | FA2BG2        |  | 7.77  | GP31 | A3G3S[3,3]2     |  | 10.75 |
| GP32 | A3G3S[3,3,3]3 |  | 10.92 | GP40 | A4F1G3S[3,3,3]3 |  | 12.39 |
|      |               |  |       |      | A4F1G3S[3,3,6]3 |  |       |

A4F1G3S[3,6,6]3

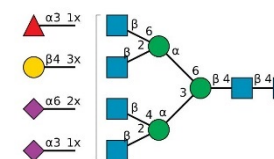

GP33

A3G3S[3,3,6]3

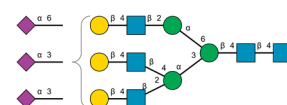

11.09

GP41

A4G4S[3,3,3,3]4

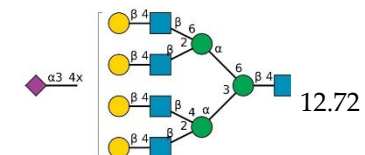

GP34

A3G3S[3,3,6]3

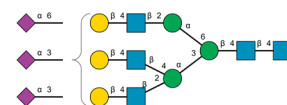

11.51

GP42

A4G4S[3,3,3,6]4

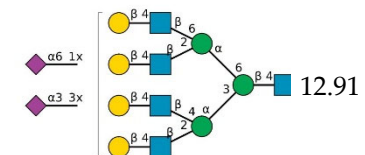

GP35

A3BG3S[3,3,3]3

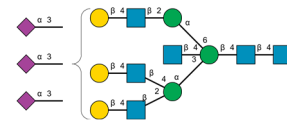

11.64

GP43

A4G4S[3,3,3,6]4

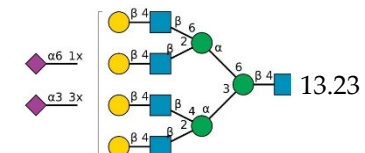

GP36

FA3G3S[3,6,6]3

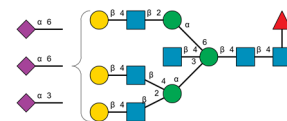

11.84

GP44

A4G4S[3,3,3,3]4

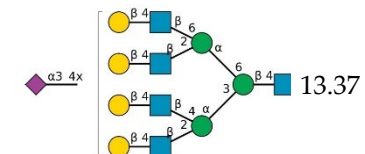

|      |                 |  |       |      |                   |  |       |
|------|-----------------|--|-------|------|-------------------|--|-------|
| GP37 | A3F1G3S[3,3,3]3 |  | 12.01 | GP45 | A4F1G4S[3,3,3,6]4 |  | 13.74 |
| GP38 | A4G4S[3,3,3]3   |  | 12.08 | GP46 | A4F3G4S[3,3,3,3]4 |  | 14.11 |
| GP39 | A4G4S[3,3,6]3   |  | 12.30 |      |                   |  |       |
|      | A4G4S[3,6,6]3   |  |       |      |                   |  |       |

Only main structures are shown in table and are defined based on assignments in Saldova et al. [12]. It is possible that on an individual basis other glycans are more prominent than those selected in this table.

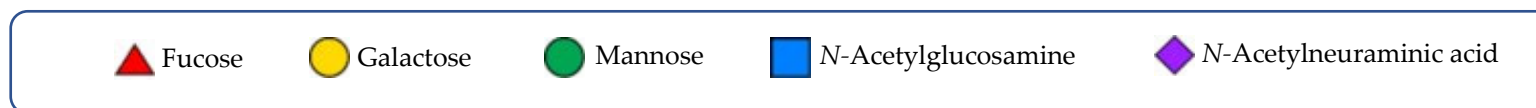

Supplement: s1 [file s1]
