# Supplementary material for: Changes in Serum N-Glycome for Risk Drinkers: A Comparison with Standard Markers for Alcohol Abuse in Men and Women
Source: MDPI journal article supplement (doi:10.3390/biom12020241), 2022-02-01
Supplement: s1 [file s1]

**Table S3.** Comparison of individual N-glycan peaks, N-glycan peaks aggregated by features, and commercial markers of alcohol abuse among categories of alcohol consumption, in men and women.

**Table S3. (A)** Comparison of N-glycan peaks among categories of alcohol consumption in men

| Glycan peak | Alcohol consumption (g/week) |                  |                   |                  | <i>p</i> -value |
|-------------|------------------------------|------------------|-------------------|------------------|-----------------|
|             | 0–9 (n = 123)                | 10–139 (n = 270) | 140–279 (n = 163) | ≥280 (n = 122)   |                 |
| GP1 (%)     | 0.11 (0.08–0.17)             | 0.11 (0.08–0.15) | 0.12 (0.08–0.18)  | 0.11 (0.08–0.18) | 0.807           |
| GP2 (%)     | 0.03 (0.02–0.05)             | 0.04 (0.02–0.05) | 0.04 (0.03–0.07)  | 0.04 (0.03–0.07) | <0.001          |
| GP3 (%)     | 0.08 (0.05–0.14)             | 0.07 (0.05–0.11) | 0.08 (0.05–0.16)  | 0.08 (0.05–0.16) | 0.076           |
| GP4 (%)     | 0.06 (0.04–0.10)             | 0.06 (0.04–0.10) | 0.06 (0.04–0.10)  | 0.06 (0.04–0.09) | 0.325           |
| GP5 (%)     | 2.50 (1.97–3.62)             | 2.22 (1.63–3.13) | 2.58 (1.77–3.73)  | 2.33 (1.74–3.28) | 0.811           |
| GP6 (%)     | 1.12 (0.88–1.46)             | 0.95 (0.76–1.28) | 1.06 (0.81–1.66)  | 1.02 (0.83–1.41) | 0.499           |
| GP7 (%)     | 0.09 (0.06–1.13)             | 0.09 (0.06–0.12) | 0.09 (0.07–0.13)  | 0.09 (0.07–0.12) | 0.198           |
| GP8 (%)     | 1.93 (1.48–2.57)             | 1.94 (1.57–2.49) | 1.97 (1.52–2.77)  | 1.72 (1.42–2.28) | 0.198           |
| GP9 (%)     | 1.10 (0.82–1.45)             | 1.09 (0.84–1.42) | 1.04 (0.81–1.39)  | 0.90 (0.75–1.31) | 0.026           |
| GP10 (%)    | 0.70 (0.52–0.92)             | 0.62 (0.50–0.81) | 0.70 (0.53–0.96)  | 0.64 (0.52–0.88) | 0.725           |
| GP11 (%)    | 0.61 (0.49–0.75)             | 0.56 (0.47–0.68) | 0.60 (0.49–0.75)  | 0.56 (0.43–0.68) | 0.341           |
| GP12 (%)    | 0.32 (0.25–0.43)             | 0.31 (0.24–0.40) | 0.29 (0.21–0.37)  | 0.31 (0.23–0.39) | 0.049           |
| GP13 (%)    | 0.08 (0.06–0.10)             | 0.07 (0.05–0.10) | 0.07 (0.05–0.10)  | 0.08 (0.06–0.10) | 0.710           |
| GP14 (%)    | 2.77 (2.21–3.36)             | 2.81 (2.31–3.41) | 2.57 (2.16–3.26)  | 2.46 (2.10–3.03) | 0.017           |
| GP15 (%)    | 0.49 (0.40–0.62)             | 0.49 (0.39–0.62) | 0.48 (0.38–0.58)  | 0.47 (0.40–0.58) | 0.199           |
| GP16 (%)    | 1.03 (0.90–1.19)             | 1.00 (0.87–1.13) | 0.95 (0.87–1.14)  | 1.03 (0.91–1.19) | 0.518           |
| GP17 (%)    | 1.06 (0.88–1.21)             | 1.07 (0.89–1.20) | 1.09 (0.86–1.25)  | 1.05 (0.87–1.23) | 0.707           |
| GP18 (%)    | 0.18 (0.12–0.23)             | 0.18 (0.14–0.22) | 0.15 (0.12–0.20)  | 0.16 (0.12–0.20) | <0.001          |
| GP19 (%)    | 7.59 (6.89–8.27)             | 7.46 (6.90–8.09) | 7.39 (6.76–7.89)  | 7.54 (6.89–8.11) | 0.501           |
| GP20 (%)    | 0.64 (0.57–0.73)             | 0.66 (0.59–0.72) | 0.62 (0.55–0.70)  | 0.65 (0.59–0.69) | 0.122           |
| GP21 (%)    | 1.27 (1.11–1.47)             | 1.30 (1.12–1.47) | 1.28 (1.11–1.54)  | 1.36 (1.17–1.52) | 0.046           |
| GP22 (%)    | 5.79 (5.16–6.81)             | 6.26 (5.46–7.02) | 5.91 (5.16–6.67)  | 5.71 (5.08–6.57) | 0.018           |
| GP23 (%)    | 2.65 (2.13–3.40)             | 2.66 (2.24–3.24) | 2.61 (2.18–3.37)  | 2.66 (2.18–3.26) | 0.827           |
| GP24 (%)    | 4.47 (3.96–5.01)             | 4.50 (4.07–4.98) | 4.31 (3.80–4.78)  | 4.46 (3.96–4.92) | 0.195           |
| GP25 (%)    | 32.4 (29.8–34.1)             | 31.9 (29.6–33.9) | 31.3 (28.9–33.5)  | 31.1 (29.0–33.5) | 0.010           |
| GP26 (%)    | 1.38 (1.23–1.62)             | 1.39 (1.22–1.62) | 1.40 (1.21–1.55)  | 1.42 (1.27–1.61) | 0.535           |
| GP27 (%)    | 5.34 (4.59–6.12)             | 5.68 (4.87–6.47) | 5.60 (4.80–6.40)  | 5.39 (4.61–6.10) | 0.931           |
| GP28 (%)    | 3.17 (2.67–3.78)             | 3.16 (2.62–3.77) | 3.16 (2.67–3.92)  | 3.38 (2.92–4.18) | 0.030           |
| GP29 (%)    | 1.68 (1.41–2.00)             | 1.70 (1.46–1.93) | 1.69 (1.44–2.02)  | 1.75 (1.49–2.06) | 0.111           |
| GP30 (%)    | 0.27 (0.21–0.33)             | 0.28 (0.22–0.34) | 0.28 (0.21–0.34)  | 0.29 (0.25–0.36) | 0.135           |
| GP31 (%)    | 0.92 (0.82–1.14)             | 0.97 (0.82–1.12) | 1.01 (0.84–1.17)  | 1.06 (0.91–1.19) | <0.001          |
| GP32 (%)    | 0.64 (0.54–0.74)             | 0.63 (0.54–0.75) | 0.68 (0.56–0.78)  | 0.70 (0.59–0.83) | 0.002           |
| GP33 (%)    | 0.88 (0.74–1.01)             | 0.89 (0.75–1.06) | 0.89 (0.77–1.06)  | 0.97 (0.78–1.13) | 0.022           |
| GP34 (%)    | 5.37 (4.34–6.30)             | 5.38 (4.39–6.66) | 5.49 (4.56–6.66)  | 5.90 (4.57–7.16) | 0.045           |
| GP35 (%)    | 0.46 (0.37–0.54)             | 0.46 (0.37–0.55) | 0.47 (0.37–0.56)  | 0.48 (0.38–0.58) | 0.286           |
| GP36 (%)    | 0.47 (0.39–0.57)             | 0.51 (0.41–0.61) | 0.51 (0.43–0.62)  | 0.51 (0.42–0.62) | 0.104           |
| GP37 (%)    | 1.62 (1.40–2.07)             | 1.66 (1.36–1.99) | 1.72 (1.42–2.11)  | 1.75 (1.44–2.11) | 0.102           |
| GP38 (%)    | 3.59 (2.85–4.86)             | 3.72 (2.95–4.62) | 3.96 (3.00–4.91)  | 3.94 (2.94–5.18) | 0.124           |
| GP39 (%)    | 0.42 (0.36–0.49)             | 0.43 (0.37–0.50) | 0.47 (0.39–0.54)  | 0.46 (0.39–0.56) | <0.001          |
| GP40 (%)    | 0.42 (0.33–0.51)             | 0.43 (0.33–0.54) | 0.46 (0.35–0.59)  | 0.44 (0.34–0.60) | 0.031           |
| GP41 (%)    | 0.45 (0.37–0.54)             | 0.43 (0.37–0.50) | 0.45 (0.37–0.51)  | 0.46 (0.38–0.53) | 0.289           |
| GP42 (%)    | 0.26 (0.20–0.33)             | 0.26 (0.20–0.33) | 0.26 (0.21–0.33)  | 0.27 (0.21–0.34) | 0.253           |
| GP43 (%)    | 0.40 (0.33–0.46)             | 0.39 (0.33–0.45) | 0.40 (0.33–0.48)  | 0.40 (0.35–0.46) | 0.543           |
| GP44 (%)    | 0.22 (0.18–0.26)             | 0.21 (0.18–0.27) | 0.23 (0.17–0.28)  | 0.23 (0.17–0.28) | 0.448           |
| GP45 (%)    | 0.27 (0.21–0.34)             | 0.26 (0.22–0.33) | 0.28 (0.22–0.34)  | 0.27 (0.21–0.33) | 0.533           |
| GP46 (%)    | 0.17 (0.12–0.22)             | 0.17 (0.12–0.24) | 0.18 (0.13–0.25)  | 0.18 (0.13–0.23) | 0.091           |

Data are medians and interquartile ranges (between parentheses). The orange colour represents higher abundance as alcohol consumption increases. The blue colour represents lower abundance as alcohol consumption increases. *p*-values were obtained with the Jonckheere-Terpstra test for trend. Uncorrected *p*-values are shown. Only *p*-values equal or lower than 0.001 would be significant at a 0.05 alpha level after correction by sequential Bonferroni adjustment.

Table S3. (B) Comparison of N-glycan peaks, aggregated in groups, among categories of alcohol consumption in men

| Glycan group | Alcohol consumption (g/week) |                  |                   |                  | <i>p</i> -value |
|--------------|------------------------------|------------------|-------------------|------------------|-----------------|
|              | 0–9 (n = 123)                | 10–139 (n = 270) | 140–279 (n = 163) | ≥280 (n = 122)   |                 |
| G0 (%)       | 3.44 (2.76–4.76)             | 3.04 (2.38–4.28) | 3.47 (2.43–5.19)  | 3.23 (2.54–4.47) | 0.818           |
| G1 (%)       | 7.01 (6.06–8.66)             | 7.02 (6.01–8.18) | 7.04 (6.02–8.67)  | 6.58 (5.82–7.88) | 0.298           |
| G2 (%)       | 68.4 (66.3–70.1)             | 68.9 (66.4–70.6) | 67.6 (65.1–69.4)  | 67.4 (65.4–69.0) | <0.001          |
| G3 (%)       | 12.2 (10.6–13.8)             | 12.3 (10.4–14.4) | 12.7 (11.0–14.4)  | 13.5 (11.3–15.2) | 0.005           |
| G4 (%)       | 6.60 (5.62–7.90)             | 6.66 (5.76–7.89) | 7.17 (5.57–8.43)  | 6.92 (5.62–8.55) | 0.052           |
| S0 (%)       | 12.3 (10.1–15.5)             | 11.5 (9.57–14.5) | 11.8 (9.68–15.9)  | 10.9 (9.32–13.4) | 0.223           |
| S1 (%)       | 21.1 (19.0–22.6)             | 21.1 (19.6–22.7) | 20.6 (19.0–22.1)  | 20.9 (19.4–22.5) | 0.257           |
| S2 (%)       | 49.4 (47.5–51.9)             | 50.0 (47.9–52.0) | 49.4 (46.7–51.5)  | 49.8 (47.4–51.3) | 0.231           |
| S3 (%)       | 14.3 (12.7–16.0)             | 14.5 (12.8–16.1) | 15.1 (13.1–16.5)  | 15.6 (13.8–17.1) | <0.001          |
| S4 (%)       | 1.79 (1.49–2.08)             | 1.75 (1.53–2.06) | 1.85 (1.56–2.18)  | 1.88 (1.48–2.20) | 0.217           |
| A1 (%)       | 1.08 (0.93–1.26)             | 1.06 (0.93–1.21) | 1.11 (0.95–1.23)  | 1.12 (1.00–1.30) | 0.008           |
| A2 (%)       | 78.6 (76.4–80.2)             | 78.6 (76.1–80.1) | 77.6 (75.8–79.4)  | 76.8 (75.2–79.1) | <0.001          |
| A3 (%)       | 10.8 (9.50–12.4)             | 11.0 (9.46–13.1) | 11.4 (9.91–13.0)  | 12.0 (10.1–13.5) | 0.004           |
| A4 (%)       | 6.60 (5.62–7.90)             | 6.66 (5.76–7.89) | 7.17 (5.57–8.43)  | 6.92 (5.62–8.55) | 0.052           |
| OM (%)       | 1.18 (0.971–1.44)            | 1.04 (0.88–1.31) | 1.15 (0.93–1.57)  | 1.07 (0.87–1.32) | 0.790           |
| CF (%)       | 30.4 (26.8–34.4)             | 30.4 (27.2–34.3) | 30.8 (27.5–34.0)  | 29.5 (26.9–33.5) | 0.750           |
| OF (%)       | 2.58 (2.25–3.06)             | 2.57 (2.23–3.02) | 2.75 (2.43–3.16)  | 2.78 (2.33–3.26) | 0.011           |

Data are medians and interquartile ranges (between parentheses). G0, agalactosylated; G1 monogalactosylated; G2, digalactosylated; G3, trigalactosylated; G4, tetragalactosylated; S0, asialylated; S1, monosialylated; S2, disialylated; S3, trisialylated; S4, tetrasialylated; A1, monoantennary; A2, biantennary; A3, triantennary; A4, tetraantennary; OM, oligomannose; CF, core-fucose; OF, outer-arm fucose. The orange colour represents higher abundance as alcohol consumption increases. The blue colour represents lower abundance as alcohol consumption increases. *p*-values were obtained with the Jonckheere-Terpstra test for trend. Uncorrected *p*-values are shown. Only *p*-values equal or lower than 0.003 would be significant at a 0.05 alpha level after correction by sequential Bonferroni adjustment.

Table S3. (C) Comparison of N-glycan peaks among categories of alcohol consumption in women

| Glycan peak | Alcohol consumption (g/week) |                  |                  |                  | <i>p</i> -value |
|-------------|------------------------------|------------------|------------------|------------------|-----------------|
|             | 0–9 (n = 423)                | 10–139 (n = 328) | 140–279 (n = 78) | ≥280 (n = 9)     |                 |
| GP1 (%)     | 0.11 (0.08–0.16)             | 0.11 (0.07–0.15) | 0.13 (0.09–0.20) | 0.12 (0.11–0.18) | 0.214           |
| GP2 (%)     | 0.03 (0.02–0.05)             | 0.03 (0.02–0.05) | 0.04 (0.03–0.06) | 0.04 (0.02–0.05) | 0.218           |
| GP3 (%)     | 0.07 (0.05–0.11)             | 0.08 (0.05–0.13) | 0.08 (0.06–0.14) | 0.11 (0.09–0.22) | 0.036           |
| GP4 (%)     | 0.06 (0.04–0.10)             | 0.06 (0.04–0.09) | 0.07 (0.04–0.10) | 0.06 (0.05–0.14) | 0.563           |
| GP5 (%)     | 2.21 (1.58–3.28)             | 2.18 (1.52–3.24) | 2.69 (1.85–3.70) | 2.85 (2.44–3.86) | 0.280           |
| GP6 (%)     | 1.02 (0.81–1.36)             | 1.01 (0.82–1.41) | 1.12 (0.88–1.63) | 1.54 (0.92–2.36) | 0.199           |
| GP7 (%)     | 0.09 (0.07–0.13)             | 0.09 (0.07–0.13) | 0.09 (0.06–0.14) | 0.10 (0.07–0.23) | 0.541           |
| GP8 (%)     | 1.92 (1.57–2.51)             | 1.90 (1.54–2.47) | 1.81 (1.54–2.58) | 1.84 (1.52–2.68) | 0.341           |
| GP9 (%)     | 1.06 (0.84–1.35)             | 1.02 (0.79–1.34) | 1.03 (0.79–1.27) | 1.09 (0.84–1.27) | 0.160           |
| GP10 (%)    | 0.68 (0.55–0.85)             | 0.67 (0.53–0.86) | 0.67 (0.54–0.90) | 0.82 (0.69–1.21) | 0.909           |
| GP11 (%)    | 0.58 (0.49–0.70)             | 0.57 (0.47–0.70) | 0.59 (0.47–0.77) | 0.68 (0.65–1.13) | 0.787           |
| GP12 (%)    | 0.31 (0.23–0.42)             | 0.33 (0.25–0.43) | 0.30 (0.23–0.38) | 0.36 (0.24–0.41) | 0.871           |
| GP13 (%)    | 0.07 (0.05–0.10)             | 0.08 (0.06–0.10) | 0.08 (0.06–0.09) | 0.10 (0.06–0.13) | 0.682           |
| GP14 (%)    | 2.80 (2.28–3.54)             | 2.84 (2.25–3.50) | 2.39 (1.97–2.92) | 2.79 (1.86–3.31) | 0.011           |
| GP15 (%)    | 0.51 (0.41–0.63)             | 0.51 (0.40–0.64) | 0.46 (0.37–0.65) | 0.51 (0.47–0.78) | 0.292           |
| GP16 (%)    | 1.02 (0.90–1.19)             | 1.05 (0.91–1.21) | 1.06 (0.90–1.18) | 1.13 (1.08–1.26) | 0.142           |
| GP17 (%)    | 1.04 (0.89–1.20)             | 1.01 (0.84–1.18) | 1.04 (0.86–1.17) | 1.13 (1.10–1.16) | 0.278           |

|          |                  |                  |                  |                  |       |
|----------|------------------|------------------|------------------|------------------|-------|
| GP18 (%) | 0.18 (0.13–0.21) | 0.18 (0.13–0.22) | 0.17 (0.12–0.22) | 0.18 (0.16–0.20) | 0.746 |
| GP19 (%) | 7.51 (6.86–8.13) | 7.62 (7.00–8.20) | 7.48 (6.95–8.19) | 7.76 (7.46–8.34) | 0.169 |
| GP20 (%) | 0.64 (0.57–0.70) | 0.64 (0.58–0.71) | 0.63 (0.57–0.72) | 0.58 (0.52–0.67) | 0.850 |
| GP21 (%) | 1.26 (1.11–1.42) | 1.26 (1.09–1.44) | 1.30 (1.05–1.44) | 1.43 (1.25–1.68) | 0.656 |
| GP22 (%) | 6.04 (5.29–7.27) | 6.00 (5.28–7.27) | 5.47 (4.79–6.28) | 5.15 (4.92–6.34) | 0.005 |
| GP23 (%) | 2.84 (2.38–3.49) | 2.85 (2.33–3.57) | 2.78 (2.10–3.57) | 3.65 (2.57–3.91) | 0.545 |
| GP24 (%) | 4.43 (3.96–4.98) | 4.59 (4.11–5.04) | 4.30 (3.98–4.91) | 3.88 (3.38–4.76) | 0.293 |
| GP25 (%) | 31.2 (29.1–33.4) | 31.4 (29.2–32.9) | 31.1 (29.1–33.7) | 28.2 (25.0–31.5) | 0.929 |
| GP26 (%) | 1.42 (1.23–1.61) | 1.40 (1.22–1.58) | 1.39 (1.26–1.56) | 1.49 (1.16–1.58) | 0.326 |
| GP27 (%) | 5.35 (4.59–6.08) | 5.23 (4.64–5.87) | 5.28 (4.72–5.76) | 4.52 (4.23–5.58) | 0.178 |
| GP28 (%) | 3.07 (2.63–3.64) | 3.16 (2.66–3.64) | 3.18 (2.73–3.89) | 3.47 (2.77–4.17) | 0.141 |
| GP29 (%) | 1.83 (1.61–2.08) | 1.91 (1.64–2.11) | 1.94 (1.63–2.19) | 1.83 (1.57–2.33) | 0.029 |
| GP30 (%) | 0.30 (0.25–0.37) | 0.31 (0.25–0.36) | 0.32 (0.26–0.37) | 0.30 (0.26–0.33) | 0.799 |
| GP31 (%) | 1.08 (0.93–1.24) | 1.13 (0.94–1.26) | 1.20 (1.00–1.32) | 1.02 (0.91–1.44) | 0.004 |
| GP32 (%) | 0.57 (0.46–0.67) | 0.59 (0.49–0.71) | 0.61 (0.52–0.73) | 0.57 (0.46–0.70) | 0.037 |
| GP33 (%) | 0.97 (0.86–1.13) | 0.99 (0.85–1.17) | 0.99 (0.87–1.13) | 0.91 (0.86–1.06) | 0.150 |
| GP34 (%) | 6.60 (5.45–7.59) | 6.49 (5.41–7.58) | 6.55 (5.71–7.56) | 6.69 (5.50–7.28) | 0.718 |
| GP35 (%) | 0.41 (0.33–0.51) | 0.43 (0.35–0.52) | 0.42 (0.34–0.52) | 0.37 (0.34–0.47) | 0.228 |
| GP36 (%) | 0.63 (0.49–0.79) | 0.61 (0.50–0.76) | 0.65 (0.55–0.77) | 0.60 (0.42–0.87) | 0.956 |
| GP37 (%) | 1.81 (1.51–2.17) | 1.78 (1.44–2.17) | 1.90 (1.52–2.33) | 1.92 (1.80–2.21) | 0.605 |
| GP38 (%) | 2.67 (1.90–3.72) | 2.83 (2.05–3.71) | 2.83 (2.07–3.72) | 1.77 (1.99–4.65) | 0.164 |
| GP39 (%) | 0.44 (0.37–0.56) | 0.45–0.38–0.53)  | 0.49 (0.42–0.58) | 0.40 (0.38–0.53) | 0.219 |
| GP40 (%) | 0.37 (0.29–0.49) | 0.39 (0.30–0.49) | 0.40 (0.30–0.51) | 0.41 (0.32–0.59) | 0.390 |
| GP41 (%) | 0.44 (0.37–0.53) | 0.45 (0.38–0.53) | 0.46 (0.39–0.56) | 0.47 (0.44–0.53) | 0.208 |
| GP42 (%) | 0.28 (0.23–0.37) | 0.30 (0.23–0.37) | 0.29 (0.24–0.34) | 0.28 (0.22–0.40) | 0.915 |
| GP43 (%) | 0.43 (0.36–0.51) | 0.43 (0.36–0.50) | 0.00 (0.38–0.52) | 0.44 (0.41–0.46) | 0.573 |
| GP44 (%) | 0.21 (0.16–0.26) | 0.21 (0.17–0.26) | 0.22 (0.17–0.26) | 0.19 (0.16–0.22) | 0.831 |
| GP45 (%) | 0.22 (0.17–0.28) | 0.22 (0.17–0.28) | 0.23 (0.18–0.28) | 0.21 (0.14–0.34) | 0.299 |
| GP46 (%) | 0.14 (0.10–0.20) | 0.15 (0.10–0.20) | 0.15 (0.11–0.21) | 0.20 (0.12–0.22) | 0.389 |

Data are medians and interquartile ranges (between parentheses). The orange colour represents higher abundance as alcohol consumption increases. The blue colour represents lower abundance as alcohol consumption increases. *p*-values were obtained with the Jonckheere-Terpstra test for trend. Uncorrected *p*-values are shown. Only *p*-values equal or lower than 0.001 would be significant at a 0.05 alpha level after correction by sequential Bonferroni adjustment.

**Table S3. (D)** Comparison of N-glycan peaks, aggregated in groups, among categories of alcohol consumption in women

| Glycan group | Alcohol consumption (g/week) |                  |                   |                  | <i>p</i> -value |
|--------------|------------------------------|------------------|-------------------|------------------|-----------------|
|              | 0–9 (n = 423)                | 10–139 (n = 328) | 140–279 (n = 78)  | ≥280 (n = 9)     |                 |
| G0 (%)       | 3.10 (2.35–4.44)             | 3.08 (2.31–4.37) | 3.72 (2.53–5.20)  | 4.17 (3.40–5.70) | 0.242           |
| G1 (%)       | 6.97 (6.18–8.07)             | 6.96 (6.01–8.21) | 6.82 (5.94–8.24)  | 7.81 (6.97–8.10) | 0.653           |
| G2 (%)       | 67.9 (65.2–69.9)             | 67.8 (65.4–70.1) | 67.2 (63.9–68.7)  | 66.8 (61.4–69.2) | 0.075           |
| G3 (%)       | 13.9 (12.2–15.7)             | 14.1 (12.4–15.9) | 14.5 (12.7–16.2)  | 14.1 (12.1–15.0) | 0.240           |
| G4 (%)       | 5.69 (4.62–6.90)             | 5.89 (4.79–6.97) | 6.06 (4.93–7.10)  | 5.45 (4.96–7.91) | 0.175           |
| S0 (%)       | 11.8 (10.1–14.5)             | 11.8 (9.83–14.3) | 11.3 (9.72–15.19) | 13.5 (12.4–18.8) | 0.649           |
| S1 (%)       | 21.2 (19.6–23.0)             | 21.2 (19.6–23.0) | 20.8 (18.5–22.7)  | 21.9 (19.8–22.2) | 0.340           |
| S2 (%)       | 49.3 (47.1–50.9)             | 49.2 (47.0–51.0) | 49.7 (47.1–51.5)  | 47.3 (42.9–48.7) | 0.787           |
| S3 (%)       | 14.9 (13.0–16.4)             | 14.9 (13.3–16.7) | 15.2 (13.4–17.3)  | 14.6 (13.7–14.8) | 0.178           |
| S4 (%)       | 1.79 (1.45–2.14)             | 1.83 (1.50–2.09) | 1.82 (1.51–2.20)  | 1.92 (1.63–2.12) | 0.499           |
| A1 (%)       | 1.05 (0.94–1.19)             | 1.06 (0.94–1.21) | 1.09 (0.97–1.25)  | 1.36 (1.12–1.43) | 0.113           |
| A2 (%)       | 77.7 (75.7–79.8)             | 77.6 (75.6–79.3) | 76.9 (74.5–79.1)  | 75.6 (74.4–79.2) | 0.030           |
| A3 (%)       | 12.7 (10.8–14.3)             | 12.7 (11.1–14.3) | 1.0 (11.6–14.5)   | 12.7 (11.2–13.3) | 0.358           |
| A4 (%)       | 5.69 (4.62–6.90)             | 5.89 (4.79–6.97) | 6.06 (4.93–7.10)  | 5.45 (4.96–7.91) | 0.175           |
| OM (%)       | 1.09 (0.92–1.38)             | 1.08 (0.89–1.36) | 1.14 (0.91–1.56)  | 1.44 (1.05–2.36) | 0.684           |
| CF (%)       | 30.5 (27.4–34.0)             | 30.2 (27.1–33.6) | 29.3 (26.5–32.3)  | 32.7 (29.1–37.8) | 0.099           |

|        |                  |                  |                  |                  |       |
|--------|------------------|------------------|------------------|------------------|-------|
| OF (%) | 2.66 (2.29–3.10) | 2.64 (2.21–3.13) | 2.79 (2.35–3.24) | 3.04 (2.24–3.25) | 0.327 |
|--------|------------------|------------------|------------------|------------------|-------|

Data are medians and interquartile ranges (between parentheses). G0, agalactosylated; G1 monogalactosylated; G2, digalactosylated; G3, trigalactosylated; G4, tetragalactosylated; S0, asialylated; S1, monosialylated; S2, disialylated; S3, trisialylated; S4, tetrasialylated; A1, monoantennary; A2, biantennary; A3, triantennary; A4, tetraantennary; OM, oligomannose; CF, core-fucose; OF, outer-arm fucose. The orange colour represents higher abundance as alcohol consumption increases. The blue colour represents lower abundance as alcohol consumption increases. *p*-values were obtained with the Jonckheere-Terpstra test for trend. Uncorrected *p*-values are shown. Only *p*-values equal or lower than 0.003 would be significant at a 0.05 alpha level after correction by sequential Bonferroni adjustment.

**Table S3. (E)** Comparison of commercial markers among categories of alcohol consumption in men

| Marker              | Alcohol consumption (g/week) |                  |                   |                | <i>p</i> -value |
|---------------------|------------------------------|------------------|-------------------|----------------|-----------------|
|                     | 0–9 (n = 123)                | 10–139 (n = 270) | 140–279 (n = 163) | ≥280 (n = 122) |                 |
| Serum GGT (IU/L)    | 19 (14–33)                   | 25 (17–39)       | 32 (23–47)        | 45 (29–68)     | <0.001          |
| Increased GGT n (%) | 11 (8.9)                     | 17 (6.3)         | 21 (12.9)         | 25 (20.5)      | <0.001          |
| RBC MCV (fL)        | 90 (86–92)                   | 89 (86–92)       | 91 (87–94)        | 93 (89–96)     | <0.001          |
| Increased MCV n (%) | 0 (0.0)                      | 2 (0.8)          | 4 (2.5)           | 11 (9.2)       | <0.001          |
| Serum CDT (%)       | 0.6 (0.5–0.7)                | 0.7 (0.6–0.9)    | 0.8 (0.7–1.2)     | 1.0 (0.8–1.8)  | <0.001          |
| Increased CDT n (%) | 2 (1.6)                      | 10 (3.7)         | 19 (11.7)         | 36 (29.5)      | <0.001          |

Data are medians and interquartile ranges (between parentheses). GGT, gamma-glutamyl transferase; RBC MCV, red blood cell mean corpuscular volume; CDT, carbohydrate-deficient transferrin. Increased GGT: values greater than 73 IU/L (reference value for men). Increased MCV: greater than 100 fL. Increased CDT: greater than 1.6%. *p*-values were obtained with the Jonckheere-Terpstra test for trend (for numerical variables) and with the chi-square test for trend (for categorical variables). The MCV was not available for 11 men.

**Table S3. (F)** Comparison of commercial markers among categories of alcohol consumption in women

| Marker              | Alcohol consumption (g/week) |                |                  |               | <i>p</i> -value |
|---------------------|------------------------------|----------------|------------------|---------------|-----------------|
|                     | 0–9 (n=423)                  | 10–139 (n=328) | 140–279 (n = 78) | ≥280 (n = 9)  |                 |
| Serum GGT (IU/L)    | 15 (11–22)                   | 15 (11–22)     | 24 (17–38)       | 67 (17–84)    | <0.001          |
| Increased GGT n (%) | 34 (8.0)                     | 25 (7.6)       | 20 (25.6)        | 6 (66.7)      | <0.001          |
| RBC MCV (fL)        | 88 (85–91)                   | 90 (87–92)     | 91 (88–93)       | 90 (89–97)    | <0.001          |
| Increased MCV n (%) | 1 (0.2)                      | 1 (0.3)        | 2 (2.6)          | 2 (22.2)      | <0.001          |
| Serum CDT (%)       | 0.6 (0.5–0.7)                | 0.6 (0.5–0.8)  | 0.8 (0.6–0.9)    | 0.8 (0.7–1.0) | <0.001          |
| Increased CDT n (%) | 0 (0.0)                      | 3 (0.9)        | 4 (5.1)          | 1 (11.1)      | <0.001          |

Data are medians and interquartile ranges (between parentheses). GGT, gamma-glutamyl transferase; RBC MCV, red blood cell mean corpuscular volume; CDT, carbohydrate-deficient transferrin. Increased GGT: values greater than 38 IU/L (reference value for women). Increased MCV: greater than 100 fL. Increased CDT: greater than 1.6%. *p*-values were obtained with the Jonckheere-Terpstra test for trend (for numerical variables) and with the chi-square test for trend (for categorical variables). The MCV was not available for 5 women.
