# Supplementary material for: Changes in Serum N-Glycome for Risk Drinkers: A Comparison with Standard Markers for Alcohol Abuse in Men and Women
Source: MDPI journal article supplement (doi:10.3390/biom12020241), 2022-02-01
Supplement: s1 [file s1]

**Table S2.** LC-MS Values detected for 2-AB labelled N-glycans for normal human serum and two representative examples

| Glycan Peak | GU   | Glycan Structure | Monosaccharide composition                                                 | Monoisotopic mass | Theoretical mass (m/z) | Ion                  | Normal human serum control | Example 0001            | Example 0002            |
|-------------|------|------------------|----------------------------------------------------------------------------|-------------------|------------------------|----------------------|----------------------------|-------------------------|-------------------------|
|             |      |                  |                                                                            |                   |                        |                      | Experimental mass (m/z)    | Experimental mass (m/z) | Experimental mass (m/z) |
| 1           | 4.80 | A1               | HexNAc <sub>3</sub> Hex <sub>3</sub>                                       | 1233.4759         | 615.7307               | [M-2H] <sup>-2</sup> | -                          | 615.7347                | 615.7307                |
|             |      | M4               | Hex <sub>4</sub>                                                           | 1192.4494         | 595.2174               | [M-2H] <sup>-2</sup> | -                          | -                       | 595.2174                |
| 2           | 5.09 | FA1              | dHex <sub>1</sub> HexNAc <sub>3</sub> Hex <sub>3</sub>                     | 1379.5338         | 688.7596               | [M-2H] <sup>-2</sup> | -                          | 688.7495                | 688.7596                |
|             |      | A2               | HexNAc <sub>4</sub> Hex <sub>3</sub>                                       | 1436.5553         | 717.2704               | [M-2H] <sup>-2</sup> | -                          | 717.2668                | 717.2704                |
| 3           | 5.33 | A1G1             | HexNAc <sub>3</sub> Hex <sub>4</sub>                                       | 1395.5287         | 696.7571               | [M-2H] <sup>-2</sup> | -                          | -                       | 696.7571                |
|             |      | A2B              | HexNAc <sub>5</sub> Hex <sub>3</sub>                                       | 1639.6346         | 818.8100               | [M-2H] <sup>-2</sup> | -                          | 688.7495                | 818.8100                |
| 4           | 5.46 | A1G1             | HexNAc <sub>3</sub> Hex <sub>4</sub>                                       | 1395.5287         | 696.7571               | [M-2H] <sup>-2</sup> | -                          | -                       | 696.7571                |
| 5           | 5.80 | FA2              | dHex <sub>1</sub> HexNAc <sub>4</sub> Hex <sub>3</sub>                     | 1582.6132         | 790.2993               | [M-2H] <sup>-2</sup> | 790.2950                   | 790.2993                | 790.2950                |
|             |      | M5               | Hex <sub>5</sub>                                                           | 1354.5022         | 676.2438               | [M-2H] <sup>-2</sup> | 676.2430                   | 676.2537                | 676.2430                |
|             |      | FA2B             | dHex <sub>1</sub> HexNAc <sub>5</sub> Hex <sub>3</sub>                     | 1785.6926         | 891.8390               | [M-2H] <sup>-2</sup> | 891.8362                   | 891.8362                | 891.8424                |
| 6           | 6.17 | FA1G1            | dHex <sub>1</sub> HexNAc <sub>3</sub> Hex <sub>4</sub>                     | 1541.5866         | 769.7860               | [M-2H] <sup>-2</sup> | 769.7758                   | 769.7814                | 769.7928                |
|             |      | A2G1             | HexNAc <sub>4</sub> Hex <sub>4</sub>                                       | 1598.6081         | 798.2968               | [M-2H] <sup>-2</sup> | 798.2897                   | 798.2995                | 798.3013                |
| 7           | 6.51 | A2BG1            | HexNAc <sub>5</sub> Hex <sub>4</sub>                                       | 1801.6875         | 899.8365               | [M-2H] <sup>-2</sup> | 899.8354                   | 899.8354                | 899.8478                |
|             |      | FA2G1            | dHex <sub>1</sub> HexNAc <sub>4</sub> Hex <sub>4</sub>                     | 1744.6660         | 871.3257               | [M-2H] <sup>-2</sup> | 871.3254                   | 871.3254                | 871.3132                |
| 8           | 6.64 | A2BG1            | HexNAc <sub>5</sub> Hex <sub>4</sub>                                       | 1801.6875         | 899.8365               | [M-2H] <sup>-2</sup> | 899.8354                   | 899.8416                | 899.8478                |
|             |      | M4A1G1           | HexNAc <sub>3</sub> Hex <sub>5</sub>                                       | 1557.5815         | 777.7835               | [M-2H] <sup>-2</sup> | 777.7748                   | 777.7806                | 777.7977                |
| 9           | 6.76 | FA2G1            | dHex <sub>1</sub> HexNAc <sub>4</sub> Hex <sub>4</sub>                     | 1744.6660         | 871.3257               | [M-2H] <sup>-2</sup> | 871.3375                   | 871.3132                | 871.3314                |
| 10          | 6.91 | FA2BG1           | dHex <sub>1</sub> HexNAc <sub>5</sub> Hex <sub>4</sub>                     | 1947.7454         | 972.8654               | [M-2H] <sup>-2</sup> | 972.8658                   | 972.8658                | 972.8530                |
| 11          | 7.05 | FA2BG1           | dHex <sub>1</sub> HexNAc <sub>5</sub> Hex <sub>4</sub>                     | 1947.7454         | 972.8654               | [M-2H] <sup>-2</sup> | 972.8787                   | 972.8658                | 972.8723                |
|             |      | M6               | Hex <sub>6</sub>                                                           | 1516.5550         | 757.2702               | [M-2H] <sup>-2</sup> | 757.2675                   | 757.2787                | 757.2731                |
| 12          | 7.13 | A1G1S1           | HexNAc <sub>3</sub> Neu5Ac <sub>1</sub> Hex <sub>4</sub>                   | 1686.6241         | 842.3048               | [M-2H] <sup>-2</sup> | 842.3096                   | 842.3036                | 842.3036                |
|             |      | A2G2             | HexNAc <sub>4</sub> Hex <sub>5</sub>                                       | 1760.6609         | 879.3232               | [M-2H] <sup>-2</sup> | 879.3235                   | 879.3356                | 879.3113                |
| 13          | 7.20 | A1G1S1           | HexNAc <sub>3</sub> Neu5Ac <sub>1</sub> Hex <sub>4</sub>                   | 1686.6241         | 842.3048               | [M-2H] <sup>-2</sup> | -                          | -                       | 842.3036                |
|             |      | A2BG2            | HexNAc <sub>5</sub> Hex <sub>5</sub>                                       | 1963.7403         | 980.8629               | [M-2H] <sup>-2</sup> | -                          | -                       | 980.8536                |
|             |      | M5A1G1           | HexNAc <sub>3</sub> Hex <sub>6</sub>                                       | 1719.6344         | 858.8099               | [M-2H] <sup>-2</sup> | -                          | 858.8076                | 858.7955                |
|             |      | FA2G2            | dHex <sub>1</sub> HexNAc <sub>4</sub> Hex <sub>5</sub>                     | 1906.7188         | 952.3521               | [M-2H] <sup>-2</sup> | 952.3431                   | 952.3367                | 952.3367                |
| 14          | 7.53 | A2G1S1           | HexNAc <sub>4</sub> Neu5Ac <sub>2</sub> Hex <sub>4</sub>                   | 1889.7036         | 943.8445               | [M-2H] <sup>-2</sup> | 943.8297                   | 943.8423                | 943.8171                |
|             |      | FA1G1S1          | dHex <sub>1</sub> HexNAc <sub>3</sub> Neu5Ac <sub>2</sub> Hex <sub>4</sub> | 1832.6820         | 915.3337               | [M-2H] <sup>-2</sup> | -                          | 915.3328                | 915.3328                |
|             |      | FA2BG2           | dHex <sub>1</sub> HexNAc <sub>5</sub> Hex <sub>5</sub>                     | 2109.7982         | 1053.8918              | [M-2H] <sup>-2</sup> | 1053.8861                  | 1053.8728               | 1053.8662               |
| 15          | 7.70 | M7               | Hex <sub>7</sub>                                                           | 1678.6078         | 838.2966               | [M-2H] <sup>-2</sup> | -                          | 838.3022                | -                       |
|             |      | A2BG1S1          | HexNAc <sub>5</sub> Neu5Ac <sub>1</sub> Hex <sub>4</sub>                   | 2092.7829         | 1045.3842              | [M-2H] <sup>-2</sup> | -                          | -                       | 1045.3936               |
|             |      | A2BG1S1          | HexNAc <sub>5</sub> Neu5Ac <sub>1</sub> Hex <sub>4</sub>                   | 2092.7829         | 1045.3842              | [M-2H] <sup>-2</sup> | 1045.3737                  | 1045.4003               | 1045.3737               |
| 16          | 7.85 | FA2G1S1          | dHex <sub>1</sub> HexNAc <sub>4</sub> Neu5Ac <sub>1</sub> Hex <sub>4</sub> | 2035.7614         | 1016.8734              | [M-2H] <sup>-2</sup> | -                          | -                       | 1016.8688               |
|             |      | M4A1G1S1         | HexNAc <sub>3</sub> Neu5Ac <sub>1</sub> Hex <sub>5</sub>                   | 1848.6770         | 923.3312               | [M-2H] <sup>-2</sup> | 923.3304                   | 923.3367                | 923.3367                |
|             |      | M7               | Hex <sub>7</sub>                                                           | 1678.6078         | 838.2966               | [M-2H] <sup>-2</sup> | 838.3081                   | 838.3081                | 838.3081                |
|             |      | FA2G1S1          | dHex <sub>1</sub> HexNAc <sub>4</sub> Neu5Ac <sub>1</sub> Hex <sub>4</sub> | 2035.7614         | 1016.8734              | [M-2H] <sup>-2</sup> | 1016.8753                  | 1016.8622               | 1016.8557               |
| 17          | 7.93 | FA2BG1S1         | dHex <sub>1</sub> HexNAc <sub>5</sub> Neu5Ac <sub>1</sub> Hex <sub>4</sub> | 2238.8408         | 1118.4131              | [M-2H] <sup>-2</sup> | 1118.4148                  | 1118.4080               | 1118.4080               |

|    |       |          |                                                                               |           |           |                      |           |           |           |
|----|-------|----------|-------------------------------------------------------------------------------|-----------|-----------|----------------------|-----------|-----------|-----------|
| 18 | 8.06  | FA2BG1S1 | dHex <sub>1</sub> HexNAc <sub>5</sub> Neu5Ac <sub>1</sub><br>Hex <sub>4</sub> | 2238.8408 | 1118.4131 | [M-2H] <sup>-2</sup> | 1118.3943 | 1118.4148 | 1118.4011 |
| 19 | 8.27  | A2G2S1   | HexNAc <sub>4</sub> Neu5Ac <sub>1</sub> Hex <sub>5</sub>                      | 2051.7563 | 1024.8709 | [M-2H] <sup>-2</sup> | 1024.8574 | 1024.8771 | 1024.8640 |
|    |       | A3G3     | HexNAc <sub>5</sub> Hex <sub>6</sub>                                          | 2125.7931 | 1061.8893 | [M-2H] <sup>-2</sup> | -         | 1061.8716 | 1061.8783 |
| 20 | 8.39  | A2BG2S1  | HexNAc <sub>5</sub> Neu5Ac <sub>1</sub> Hex <sub>5</sub>                      | 2254.8357 | 1126.4106 | [M-2H] <sup>-2</sup> | -         | 1126.4204 | -         |
|    |       | M5A1G1S1 | HexNAc <sub>3</sub> Neu5Ac <sub>1</sub> Hex <sub>6</sub>                      | 2010.7298 | 1004.3576 | [M-2H] <sup>-2</sup> | -         | -         | -         |
| 21 | 8.55  | FA3G3    | dHex <sub>1</sub> HexNAc <sub>5</sub> Hex <sub>6</sub>                        | 2271.8510 | 1134.9182 | [M-2H] <sup>-2</sup> | -         | -         | -         |
|    |       | M8       | Hex <sub>8</sub>                                                              | 1840.6606 | 919.3230  | [M-2H] <sup>-2</sup> | -         | -         | -         |
|    |       | A2G2S1   | HexNAc <sub>4</sub> Neu5Ac <sub>1</sub> Hex <sub>5</sub>                      | 2051.7563 | 1024.8709 | [M-2H] <sup>-2</sup> | -         | -         | -         |
| 22 | 8.67  | FA2G2S1  | dHex <sub>1</sub> HexNAc <sub>4</sub> Neu5Ac <sub>1</sub><br>Hex <sub>5</sub> | 2197.8142 | 1097.8998 | [M-2H] <sup>-2</sup> | 1097.8971 | 1097.9039 | 1097.8971 |
|    |       | M8       | Hex <sub>8</sub>                                                              | 1840.6606 | 919.3230  | [M-2H] <sup>-2</sup> | -         | 919.3272  | 919.3334  |
| 23 | 8.92  | FA2BG2S1 | dHex <sub>1</sub> HexNAc <sub>5</sub> Neu5Ac <sub>1</sub><br>Hex <sub>5</sub> | 2400.8936 | 1199.4395 | [M-2H] <sup>-2</sup> | 1199.4496 | 1199.4211 | 1199.4282 |
|    |       | A2F1G2S1 | dHex <sub>1</sub> HexNAc <sub>4</sub> Neu5Ac <sub>1</sub><br>Hex <sub>5</sub> | 2197.8142 | 1097.8998 | [M-2H] <sup>-2</sup> | 1097.9106 | -         | 1097.8835 |
| 24 | 9.08  | A2G2S2   | HexNAc <sub>4</sub> Neu5Ac <sub>2</sub> Hex <sub>5</sub>                      | 2342.8518 | 1170.4186 | [M-2H] <sup>-2</sup> | 1170.4243 | 1170.4314 | 1170.4103 |
|    |       | FA2G2S2  | dHex <sub>1</sub> HexNAc <sub>4</sub> Neu5Ac <sub>2</sub><br>Hex <sub>5</sub> | 2488.9097 | 1243.4476 | [M-2H] <sup>-2</sup> | 1243.4333 | 1243.4333 | 1243.4261 |
|    |       | A2G2S2   | HexNAc <sub>4</sub> Neu5Ac <sub>2</sub> Hex <sub>5</sub>                      | 2342.8518 | 1170.4186 | [M-2H] <sup>-2</sup> | 1170.4172 | 1170.4103 | 1170.4103 |
| 25 | 9.50  | M9       | Hex <sub>9</sub>                                                              | 2002.7135 | 1000.3495 | [M-2H] <sup>-2</sup> | 1000.3363 | 1000.3428 | 1000.3493 |
|    |       | A3G3S1   | HexNAc <sub>5</sub> Neu5Ac <sub>1</sub> Hex <sub>6</sub>                      | 2416.8885 | 1207.4370 | [M-2H] <sup>-2</sup> | 1207.4473 | 1207.4145 | 1207.4045 |
|    |       | A3BG3S1  | HexNAc <sub>6</sub> Neu5Ac <sub>1</sub> Hex <sub>6</sub>                      | 2619.9679 | 1308.9767 | [M-2H] <sup>-2</sup> | -         | -         | 1308.9713 |
|    |       | FA3G3S1  | dHex <sub>1</sub> HexNAc <sub>5</sub> Neu5Ac <sub>1</sub><br>Hex <sub>6</sub> | 2562.9464 | 1280.4659 | [M-2H] <sup>-2</sup> | -         | 1280.4542 | 1280.4689 |
| 26 | 9.67  | FA3BG3S1 | dHex <sub>1</sub> HexNAc <sub>5</sub> Neu5Ac <sub>1</sub><br>Hex <sub>6</sub> | 2766.0258 | 1382.0056 | [M-2H] <sup>-2</sup> | -         | -         | -         |
|    |       | A2BG2S2  | HexNAc <sub>5</sub> Neu5Ac <sub>2</sub> Hex <sub>5</sub>                      | 2545.9311 | 1271.9583 | [M-2H] <sup>-2</sup> | -         | 1271.9691 | 1271.9691 |
|    |       | A3F1G3S1 | dHex <sub>1</sub> HexNAc <sub>5</sub> Neu5Ac <sub>1</sub><br>Hex <sub>6</sub> | 2562.9464 | 1280.4659 | [M-2H] <sup>-2</sup> | -         | -         | 1280.4542 |
| 27 | 9.91  | FA2G2S2  | dHex <sub>1</sub> HexNAc <sub>4</sub> Neu5Ac <sub>2</sub><br>Hex <sub>5</sub> | 2488.9097 | 1243.4476 | [M-2H] <sup>-2</sup> | 1243.4333 | 1243.4406 | 1243.4333 |
|    |       | FA2BG2S2 | dHex <sub>1</sub> HexNAc <sub>5</sub> Neu5Ac <sub>2</sub><br>Hex <sub>5</sub> | 2691.9890 | 1344.9872 | [M-2H] <sup>-2</sup> | 1344.9617 | 1344.9841 | 1344.9767 |
| 28 | 10.07 | A2F1G2S2 | dHex <sub>1</sub> HexNAc <sub>4</sub> Neu5Ac <sub>2</sub><br>Hex <sub>5</sub> | 2488.9097 | 1243.4476 | [M-2H] <sup>-2</sup> | 1243.4623 | 1243.4406 | 1243.4551 |
|    |       | M9Glc    | HexNAc <sub>1</sub> Hex <sub>9</sub>                                          | 2205.7928 | 1101.8891 | [M-2H] <sup>-2</sup> | -         | -         | -         |
| 29 | 10.19 | A3G3S2   | HexNAc <sub>5</sub> Neu5Ac <sub>2</sub> Hex <sub>6</sub>                      | 2707.9839 | 1352.9847 | [M-2H] <sup>-2</sup> | 1352.9846 | 1352.9846 | 1352.9620 |
|    |       | A3BG3S2  | HexNAc <sub>6</sub> Neu5Ac <sub>2</sub> Hex <sub>6</sub>                      | 2911.0633 | 1454.5244 | [M-2H] <sup>-2</sup> | -         | -         | -         |
| 30 | 10.47 | A4G4S1   | HexNAc <sub>6</sub> Neu5Ac <sub>1</sub> Hex <sub>7</sub>                      | 3655.3070 | 1826.6462 | [M-2H] <sup>-2</sup> | -         | -         | -         |
| 31 | 10.67 | FA3G3S2  | dHex <sub>1</sub> HexNAc <sub>5</sub> Neu5Ac <sub>2</sub><br>Hex <sub>6</sub> | 2854.0419 | 1426.0137 | [M-2H] <sup>-2</sup> | -         | 1426.0101 | 1426.0333 |
|    |       | A3G3S2   | HexNAc <sub>5</sub> Neu5Ac <sub>2</sub> Hex <sub>6</sub>                      | 2707.9839 | 1352.9847 | [M-2H] <sup>-2</sup> | 1352.9998 | 1352.9696 | 1352.9620 |
|    |       | A3G3S3   | HexNAc <sub>5</sub> Neu5Ac <sub>3</sub> Hex <sub>6</sub>                      | 2999.0794 | 1498.5324 | [M-2H] <sup>-2</sup> | -         | -         | -         |
| 32 | 10.83 | A3F1G3S2 | dHex <sub>1</sub> HexNAc <sub>5</sub> Neu5Ac <sub>2</sub><br>Hex <sub>6</sub> | 2854.0419 | 1426.0137 | [M-2H] <sup>-2</sup> | -         | -         | 1426.0178 |
|    |       | A4G4S1   | HexNAc <sub>6</sub> Neu5Ac <sub>1</sub> Hex <sub>7</sub>                      | 3655.3070 | 1826.6462 | [M-2H] <sup>-2</sup> | -         | -         | -         |
| 33 | 11.02 | A3G3S3   | HexNAc <sub>5</sub> Neu5Ac <sub>3</sub> Hex <sub>6</sub>                      | 2999.0794 | 1498.5324 | [M-2H] <sup>-2</sup> | -         | 1498.5243 | 1498.5162 |
|    |       | A3BG3S3  | HexNAc <sub>6</sub> Neu5Ac <sub>3</sub> Hex <sub>6</sub>                      | 3202.1587 | 1600.0721 | [M-2H] <sup>-2</sup> | -         | -         | -         |
| 34 | 11.43 | FA3G3S3  | dHex <sub>1</sub> HexNAc <sub>5</sub> Neu5Ac <sub>3</sub><br>Hex <sub>6</sub> | 3145.1373 | 1571.5614 | [M-2H] <sup>-2</sup> | -         | -         | 1571.5516 |

|    |       |            |                                                                               |           |           |                      |           |           |           |
|----|-------|------------|-------------------------------------------------------------------------------|-----------|-----------|----------------------|-----------|-----------|-----------|
|    |       | FA3BG3S3   | dHex <sub>1</sub> HexNAc <sub>6</sub> Neu5Ac <sub>3</sub><br>Hex <sub>6</sub> | 3348.2166 | 1673.1010 | [M-2H] <sup>-2</sup> | -         | -         | -         |
|    |       | A4G4S2     | HexNAc <sub>6</sub> Neu5Ac <sub>2</sub> Hex <sub>7</sub>                      | 3073.1161 | 1535.5508 | [M-2H] <sup>-2</sup> | -         | -         | -         |
|    |       | A3G3S3     | HexNAc <sub>5</sub> Neu5Ac <sub>3</sub> Hex <sub>6</sub>                      | 2999.0794 | 1498.5324 | [M-2H] <sup>-2</sup> | 1498.5560 | 1498.5243 | 1498.5322 |
| 35 | 11.57 | A3BG3S3    | HexNAc <sub>6</sub> Neu5Ac <sub>3</sub> Hex <sub>6</sub>                      | 3202.1587 | 1600.0721 | [M-2H] <sup>-2</sup> | -         | -         | -         |
| 36 | 11.77 | FA3G3S3    | dHex <sub>1</sub> HexNAc <sub>5</sub> Neu5Ac <sub>3</sub><br>Hex <sub>6</sub> | 3145.1373 | 1571.5614 | [M-2H] <sup>-2</sup> | -         | -         | 1571.5516 |
|    |       | A3G3S3     | HexNAc <sub>5</sub> Neu5Ac <sub>3</sub> Hex <sub>6</sub>                      | 2999.0794 | 1498.5324 | [M-2H] <sup>-2</sup> | 1498.5560 | 1498.5162 | 1498.5243 |
| 37 | 11.93 | A3F1G3S3   | dHex <sub>1</sub> HexNAc <sub>5</sub> Neu5Ac <sub>3</sub><br>Hex <sub>6</sub> | 3145.1373 | 1571.5614 | [M-2H] <sup>-2</sup> | 1571.5516 | 1571.5516 | 1571.5435 |
|    |       | FA3BG3S3   | dHex <sub>1</sub> HexNAc <sub>6</sub> Neu5Ac <sub>3</sub><br>Hex <sub>6</sub> | 3348.2166 | 1673.1010 | [M-2H] <sup>-2</sup> | -         | -         | -         |
|    |       | A4G4S3     | HexNAc <sub>6</sub> Neu5Ac <sub>3</sub> Hex <sub>7</sub>                      | 3364.2116 | 1681.0985 | [M-2H] <sup>-2</sup> | 1681.1193 | 1681.0941 | -         |
| 38 | 12.00 | A3F1G3S3   | dHex <sub>1</sub> HexNAc <sub>5</sub> Neu5Ac <sub>3</sub><br>Hex <sub>6</sub> | 3145.1373 | 1571.5614 | [M-2H] <sup>-2</sup> | 1571.5435 | 1571.5516 | 1571.5110 |
| 39 | 12.21 | A4G4S3     | HexNAc <sub>6</sub> Neu5Ac <sub>3</sub> Hex <sub>7</sub>                      | 3364.2116 | 1681.0985 | [M-2H] <sup>-2</sup> | 1681.1193 | -         | -         |
| 40 | 12.32 | A4F1G3S3   | dHex <sub>1</sub> HexNAc <sub>6</sub> Neu5Ac <sub>3</sub><br>Hex <sub>6</sub> | 3348.2166 | 1673.1010 | [M-2H] <sup>-2</sup> | -         | -         | -         |
|    |       | A3F2G3S3   | dHex <sub>2</sub> HexNAc <sub>5</sub> Neu5Ac <sub>3</sub><br>Hex <sub>6</sub> | 3291.1952 | 1644.5903 | [M-2H] <sup>-2</sup> | -         | 1644.5774 | -         |
|    |       | A4G4S4     | HexNAc <sub>6</sub> Neu5Ac <sub>4</sub> Hex <sub>7</sub>                      | 3655.3070 | 1826.6462 | [M-2H] <sup>-2</sup> | -         | -         | -         |
| 41 | 23.57 | A3F2G3S3   | dHex <sub>2</sub> HexNAc <sub>5</sub> Neu5Ac <sub>3</sub><br>Hex <sub>6</sub> | 3291.1952 | 1644.5903 | [M-2H] <sup>-2</sup> | -         | -         | -         |
|    |       | A4F2G3S3   | dHex <sub>2</sub> HexNAc <sub>6</sub> Neu5Ac <sub>3</sub><br>Hex <sub>6</sub> | 3494.2746 | 1746.1300 | [M-2H] <sup>-2</sup> | -         | -         | -         |
| 42 | 12.82 | A4G4S4     | HexNAc <sub>6</sub> Neu5Ac <sub>4</sub> Hex <sub>7</sub>                      | 3655.3070 | 1826.6462 | [M-2H] <sup>-2</sup> | -         | -         | -         |
| 43 | 13.14 | A4G4S4     | HexNAc <sub>6</sub> Neu5Ac <sub>4</sub> Hex <sub>7</sub>                      | 3655.3070 | 1826.6462 | [M-2H] <sup>-2</sup> | -         | -         | -         |
|    |       | A4G4S4     | HexNAc <sub>6</sub> Neu5Ac <sub>4</sub> Hex <sub>7</sub>                      | 3655.3070 | 1826.6462 | [M-2H] <sup>-2</sup> | -         | -         | -         |
| 44 | 13.27 | FA4G4S4    | dHex <sub>1</sub> HexNAc <sub>6</sub> Neu5Ac <sub>4</sub><br>Hex <sub>7</sub> | 3801.3649 | 1899.6752 | [M-2H] <sup>-2</sup> | -         | -         | -         |
|    |       | A4BG4S4    | HexNAc <sub>7</sub> Neu5Ac <sub>4</sub> Hex <sub>7</sub>                      | 3858.3864 | 1928.1859 | [M-2H] <sup>-2</sup> | -         | -         | -         |
| 45 | 13.63 | A4F1G4S4   | dHex <sub>1</sub> HexNAc <sub>6</sub> Neu5Ac <sub>4</sub><br>Hex <sub>7</sub> | 3801.3649 | 1899.6752 | [M-2H] <sup>-2</sup> | -         | -         | -         |
|    |       | A4F2G4S4   | dHex <sub>2</sub> HexNAc <sub>6</sub> Neu5Ac <sub>4</sub><br>Hex <sub>7</sub> | 3947.4228 | 1972.7041 | [M-2H] <sup>-2</sup> | -         | -         | -         |
| 46 | 14.22 | A4F3G4S4   | dHex <sub>3</sub> HexNAc <sub>6</sub> Neu5Ac <sub>4</sub><br>Hex <sub>7</sub> | 4093.4807 | 2045.7331 | [M-2H] <sup>-2</sup> | -         | -         | -         |
|    |       | A4G4Lac1S4 | HexNAc <sub>7</sub> Neu5Ac <sub>4</sub> Hex <sub>8</sub>                      | 4020.4392 | 2009.2123 | [M-2H] <sup>-2</sup> | -         | -         | -         |
